# Supplementary material for: Integration of fluorescence/photoacoustic imaging and targeted chemo/photothermal therapy with Ag2Se@BSA-RGD nanodots
Source: Royal Society of Chemistry journal article supplement (doi:10.1039/d0nj00240b), 2020-01-01
Supplement: d0nj00240b1.pdf [file d0nj00240b1.pdf]

# Supporting information

## Integration of Fluorescence/Photoacoustics Imaging and Targeted Chemo/Photothermal Therapy with Ag<sub>2</sub>Se@BSA-RGD Nanodots

Xiuhui Yin, Xianglong Li, Chunling Zhu\*, Xucong Lin, Zenghong Xie

College of Chemistry, Fuzhou University, Fuzhou 350108, P.R. China. Fax: +86 591

22866159

\*Tel: +86 591 22866159; \*E-mail: clzhu@fzu.edu.cn

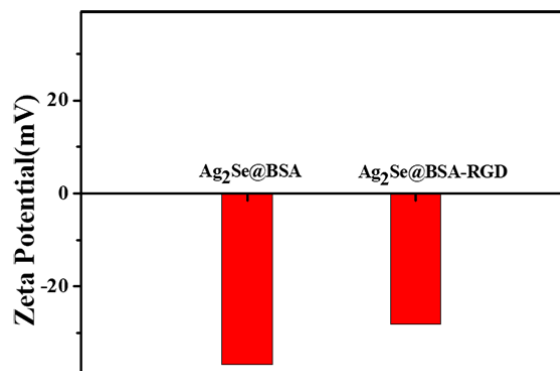

**Fig. S1** Zeta potential of Ag<sub>2</sub>Se@BSA and Ag<sub>2</sub>Se@BSA-RGD QDs.

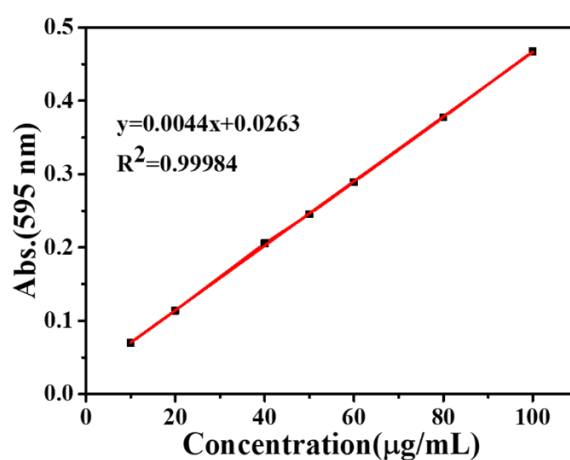

**Fig. S2** Standard adsorption curve of G250 with RGD at 595 nm.

The modification RGD molecules on QDs was calculated as the following equation:

$$\frac{\text{Total RGD added} - \text{RGD in supernatant}}{\text{Ag}_2\text{Se@BSA QDs}}$$

The RGD content in the supernatant was detected and calculated according to the standard working curve of RGD. And the mass ratio of total added RGD and Ag<sub>2</sub>Se@BSA QDs is 1: 5.

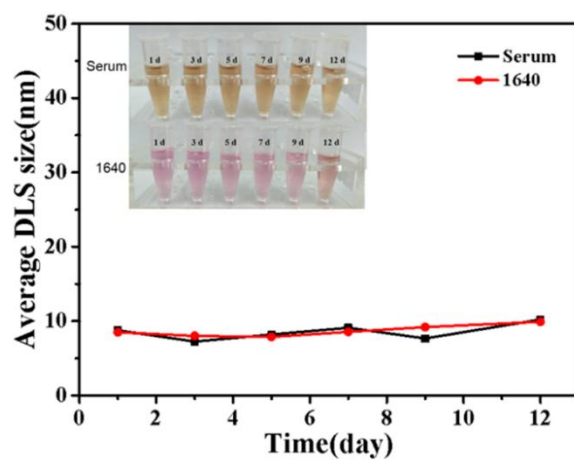

**Fig. S3** Evaluation the stability of Ag<sub>2</sub>Se@BSA-RGD QDs in the serum and RPMI 1640 medium.

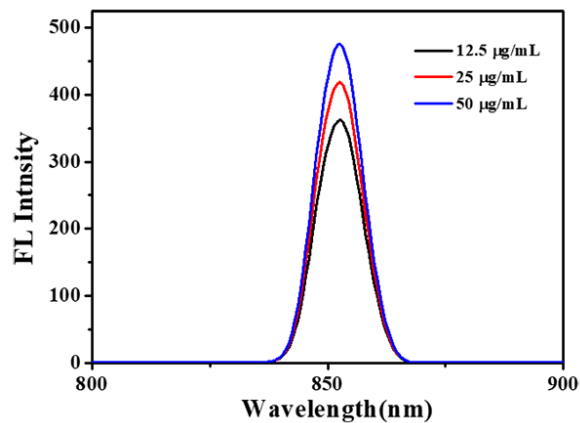

**Fig. S4** Fluorescence spectrums of Ag<sub>2</sub>Se@BSA QDs with different concentration.

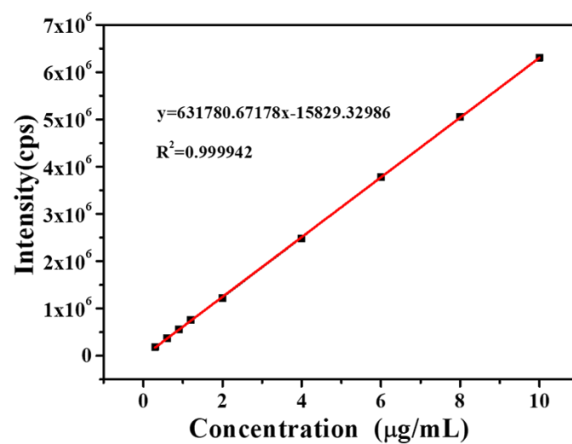

**Fig. S5** ICP-AES quantitative fitting of the standard curve of  $\text{Ag}^+$ .

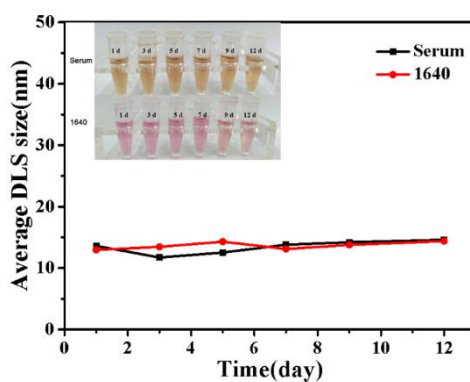

**Fig. S6** Stability of  $\text{Ag}_2\text{Se@BSA-DOX}$  during the incubation with serum or RPMI 1640 medium for 12 days, respectively.

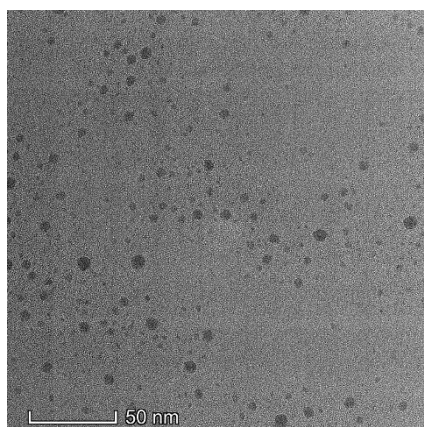

**Fig. S7** TEM image of  $\text{Ag}_2\text{Se@BSA-DOX-RGD}$ .

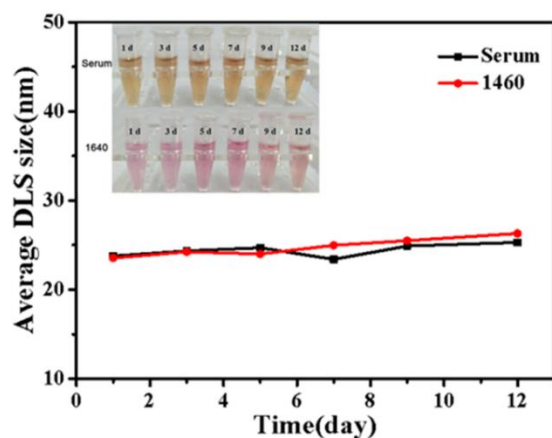

**Fig. S8** Stability of Ag<sub>2</sub>Se@BSA-DOX-RGD during the incubation with serum or RPMI 1640 medium for 12 days, respectively.

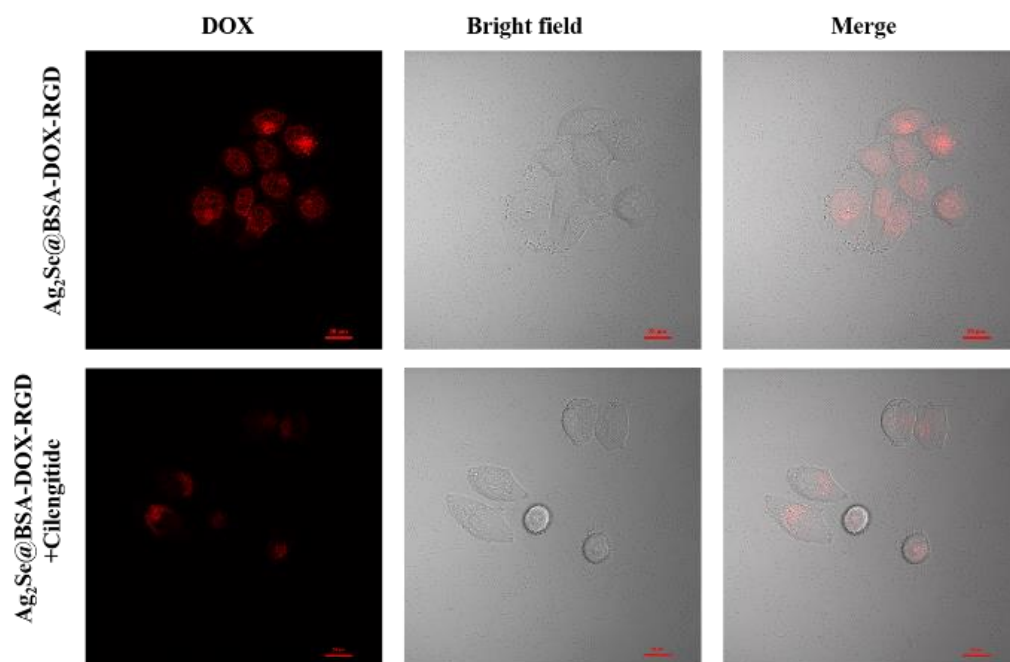

**Fig. S9** CLSM image of Ag<sub>2</sub>Se@BSA-DOX-RGD QDs incubated with HeLa cells for 4 h, the first to third columns are dark field, bright field, and Merge field, respectively. The concentration of Ag<sup>+</sup> and DOX in all the groups are 1.39 mM and 5 µg/mL. The content of cilengitide is 50 µM.

## 1. Determining fluorescence quantum yield of Ag<sub>2</sub>Se@BSA QDs

The quantum yield (QY) of as-synthesized Ag<sub>2</sub>Se@BSA QDs was measured using indocyanine green (ICG) as a reference (QY=13% in DMSO). The absorption spectra of the Ag<sub>2</sub>Se QDs and ICG solutions were recorded. Then the fluorescence spectra of these samples were recorded under the same excitation. The fluorescence quantum yield was calculated according to the following equation:

$$\phi_{QD} = \phi_{ICG} \left( \frac{F_{QD}}{F_{ICG}} \right) \left( \frac{A_{ICG}}{A_{QD}} \right) \left( \frac{n_{QD}}{n_{ICG}} \right)^2$$

Where  $\phi_{QD}$ ,  $F_{QD}$ ,  $A_{ICG}$ ,  $n_{QD}$  are the quantum yield (QY), integrated fluorescence intensity, integrated absorption and refractive index of the solvent for the Ag<sub>2</sub>Se QDs. The parameters with a subscript of ICG are corresponding quantities of ICG. All data are measured three times and averaged.

## 2. Calculation of the photothermal conversion efficiency (PTCE)

The formula of the photothermal conversion efficiency is as following:

$$\eta = \frac{\sum m_i c_i (T_{max} - T_{max, H_2O})}{\tau_s I (1 - 10^{-A_{808}})}$$

With  $\tau_s$  is equal to 500 s, m is 1.0 g and C is 4.2 J/g, Substituting  $I = 2.0$  W,  $A_{808} = 0.2842$ ,  $T_{max} - T_{max, H_2O} = 58.8 - 27 = 31.8$  °C into above formula,  $PTCE = (0.0084 * 31.8) / (2 * (1 - 10^{-0.2842})) = 27.8\%$
